# Supplementary material
Source: publisher site journal article supplement (https://www.dovepress.com/article/309178)
Supplement: Supplementary file 1 [file get_supplementary_file.php]

**Appendices**

**Appendix A: Summary of responsibilities for each committee role.**

- **Director:** Responsible for creating the yearly timetable, leading the recruitment process, seeking internal and external funding opportunities, managing the yearly budget and fostering relationships with the KCL widening participation and Brightside teams. This is a two year role, whereby the second year enables the current director to concurrently train the next in line, of whom must be already on committee.
- **Deputy Director:** Supports the director with core committee activities. With additional responsibility for room bookings and working with the safeguarding team at KCL Student Union (KCLSU) to ensure all student ambassadors are appropriately trained and DBS approved.
- **Outreach Officers:** We have two outreach officers responsible for producing resources for the face-to-face sessions, including a presentation for the start of the session and ambassador guidance documents. During the sessions they must also take a register to monitor attendance and collect feedback after the sessions. They are also jointly responsible for the Brightside support channel, allowing them to moderate messages sent on the platform.
- **Admin Officer:** Primarily responsible for the InsideMed email account. In the initial recruitment phase, they inform students of the outcome of their applications. Throughout the year, they are responsible for providing details of the sessions ahead of time and dealing with any queries. They also assist the director with liaising with external companies such as Brightside and our sponsors.
- **Newsletter Coordinator:** Responsible for writing and distributing the bi-monthly newsletter to all year 12 students, medical student ambassadors and committee members. The newsletter contains details of upcoming courses that may be of interest to the year 12 students and any suggested reading for them. It also acts as a reminder of the remaining upcoming sessions and includes biographies from InsideMed graduates, where they explain what InsideMed taught them and where they are now.

**Appendix B: InsideMed’s Strategy to engage all stakeholders**

The narrow stakeholders (innermost circle of Figure 1) involve the medical student ambassadors at KCL, and in local state schools, year 12 aspiring medical students, their teachers and admin staff.  Medical student volunteers, although value the idea of giving back to the community, are encouraged to store evidence of this to enhance their portfolio. Therefore, we award students with a certificate at the end of the year and award prizes to the most dedicated ambassador. We reach students through the EMDP Society’s Facebook page, seeking permission from the EMDP course Director and editor of the King’s Medical Student’s Association newsletter to email all students with details and application forms. Reaching the relevant teachers in each school is challenging, whereby persistence and exhausting all available communication methods is vital. Our approach involves priming teachers with details of who we are and our aims, and in turn raising early student awareness, in June, reducing the likelihood of emails becoming buried in the hectic admin period associated with summer exams. To aid teachers in raising awareness of our scheme, we provide them with online and paper posters for distribution and display. Subsequent contact in early September with further details and application forms permits sufficient time for students to prepare and submit an application.

The next circle illustrates key organisations we collaborated with to ensure we had the permissions to create our scheme. KCLSU were essential for this, providing locations for the sessions and safeguarding training for our ambassadors. Additionally, the KCL outreach team have a wealth of experience with managing outreach courses and provided us with guidance on session content and communication channels to reach local state schools which meet the EMDP admissions criteria. The outreach team also allowed us to use their existing contract with *Brightside Mentoring* to ensure safe online communication between ambassadors and year 12 students.

The third circle illustrates the stakeholders to enable growth and sustainability of InsideMed. Since the heart of our scheme is about creating a community, our expansion strategy involves providing students with role models from comparable socioeconomic backgrounds, spanning from qualified doctors, medical students in varying year groups, and those very close in age, ie our InsideMed graduates. Forming relations with sponsors enables us to have the financial support to provide students with useful resources, such as University Clinical Aptitude Test

(UCAT) revision books, and create an inviting atmosphere, with refreshments and prizes for our end of year achievement evening. Our financial sponsorship is both internal through the university student union widening participation fund, and carefully selected external sources. The outermost ring of Figure 1 represents broad stakeholders which we will eventually impact. With each InsideMed cohort, we aim to change the face of doctors, so our workforce represents the general public they are treating. We can achieve this aim faster through sharing our knowledge of creating this outreach scheme, so other universities can run similar schemes through adapting our model appropriately, and in turn encourage collaboration across the UK.

**Appendix C: Questions asked to Year 12 students and Medical student ambassadors**

**Year 12 student Application questions:**

1.     why does a career in medicine appeal to you?

2.     what have you already done to investigate the realities of a career in medicine?

3.     How will attending the InsideMed mentoring scheme help you?

4.     What do you think you would bring to the programme?

**Medical Student ambassador Application questions:**

1.     why would you like to be involved in the mentoring scheme?

2.     What experience have you had working with younger students?

3.     Were you involved in a similar programme, as a mentee, before entering medical school? If yes, please provide a brief explanation of how it benefited you.

4.     What do you think you can offer as a mentor?

Each question was scored from 1 to 5 based on whether they answer the question, provide evidence/examples to back up statements, discuss skills with relevance and contain minimal grammatical and spelling errors. Applications scoring above 15 are considered for the programme, with few being rejected.  The same scoring system was used for ambassador applications, based on the answers given to the questions in Figure 4. The threshold of 15 remained.
